# Supplementary material
Source: MDPI journal article supplement (https://www.mdpi.com/2071-1050/14/24/16755)
Supplement: s1 [file s1]

Archive with 2 entries (2 files):
- Suplementary File .pdf
- Suplementary File 2.pdf
