# Supplementary material
Source: MDPI journal article supplement (https://www.mdpi.com/2071-1050/14/24/16755)
Supplement: s1 [file s1 › Suplementary File .pdf]

| First Order                      | Second Order   | Third Order                                                                                                                                           | Fourth Order                                                                                                                                                                                                                                                  |
|----------------------------------|----------------|-------------------------------------------------------------------------------------------------------------------------------------------------------|---------------------------------------------------------------------------------------------------------------------------------------------------------------------------------------------------------------------------------------------------------------|
| Human Element (immediate causes) | Human physical | Unsuitable size and body shape                                                                                                                        | Height                                                                                                                                                                                                                                                        |
|                                  |                | Lack of strength<br>Lack of stamina<br>Fatigue<br>Poor health condition<br>Physical disability<br>Intoxication and drug effects<br>Stress and tension | Size                                                                                                                                                                                                                                                          |
|                                  | Experience     | Knowledge and information                                                                                                                             | Lack of knowledge and information<br>Excess of knowledge and information (confusing)<br>Skills inappropriate to the tasks<br>Lack of experiences and trainings<br>Incompetent<br>Near misses                                                                  |
|                                  |                | Lack of skill                                                                                                                                         | Directly or indirectly involved                                                                                                                                                                                                                               |
|                                  |                | Occupational accidents and illnesses records                                                                                                          |                                                                                                                                                                                                                                                               |
|                                  |                | Extensive experiences leading to lack of safety awareness<br>Language and communication problems<br>Illiterate                                        |                                                                                                                                                                                                                                                               |
|                                  | Attitude       | Towards organisation                                                                                                                                  | Neglecting the reputation and performances of an organisation<br>Neglecting organisation's safety and health policy<br>Neglecting organisation's safety procedures                                                                                            |
|                                  |                | Personal attitude                                                                                                                                     | Satisfy with level of safety performance<br>Excessive confidence<br>Underestimate risks of accidents and illnesses<br>Negative attitudes (stubborn, arrogant, selfishness or showing off)<br>Defeatist/lack of confidence<br>Doubtful and bad decision making |
|                                  |                | Motivation/needs                                                                                                                                      | Prioritizing basic needs<br>Prioritizing psychological needs (rapport in an organisation, rapport among colleagues, performance and achievement)<br>Prioritizing self-actualization (achieving personal full potential)                                       |
|                                  |                |                                                                                                                                                       |                                                                                                                                                                                                                                                               |
| Behaviour                        | Error          | Lack of focus<br>Complicated procedures<br>Lengthy tasks<br>Wrong reasoning behind actions<br>Following the wrong procedures                          |                                                                                                                                                                                                                                                               |

| First Order                               | Second Order           | Third Order                                                       | Fourth Order                                                                                                                                                                                 |
|-------------------------------------------|------------------------|-------------------------------------------------------------------|----------------------------------------------------------------------------------------------------------------------------------------------------------------------------------------------|
|                                           |                        | Violation                                                         | Standard practice in a group or entire organisation to break the rule or procedure<br>Due to insufficient time<br>Due to pressure of work<br>In order to solve problems/emergency situations |
| Worksite Element<br>(immediate causes)    | Worksite condition     | Noise                                                             | Noise induced hearing illnesses<br>Interrupting communication processes (giving and receiving instructions)                                                                                  |
|                                           |                        | Insufficient lighting<br>Insufficient ventilation                 | In open areas<br>In closed areas                                                                                                                                                             |
|                                           |                        | Weather                                                           | Excessive heat<br>Rain                                                                                                                                                                       |
|                                           |                        | Poor facilities (electrical, hydraulic, supervising, maintenance) |                                                                                                                                                                                              |
|                                           |                        | Poor site management                                              |                                                                                                                                                                                              |
|                                           | Equipment and material | Poor level of cleanliness and tidiness<br>Poor waste management   | No designated space<br>No proper disposing schedule                                                                                                                                          |
|                                           |                        | Working path and surface                                          | Working path blocked<br>Watery surface and working path<br>Slippery surface and working path                                                                                                 |
|                                           |                        | Poor equipment, material and waste arrangements                   |                                                                                                                                                                                              |
|                                           |                        | Construction materials                                            | Unsuitable<br>Poor condition<br>Adverse health effect                                                                                                                                        |
|                                           |                        | Equipment and tools                                               | Unsuitable<br>Poor condition<br>Lack of safety features                                                                                                                                      |
| Management Element<br>(underlying causes) | Resource management    | Demanding tasks                                                   |                                                                                                                                                                                              |
|                                           |                        | Capital resources                                                 | Prioritizing profitability over safety<br>Prioritizing prices over safety level in buying equipment<br>Insufficient budget for occupational safety and health management                     |
|                                           |                        | Human resources                                                   | Insufficient time provided<br>Neglecting safety and health elements during recruitment and selection                                                                                         |

| First Order | Second Order       | Third Order                                                                                                                                                                                                                                                                                                                                                                                                      | Fourth Order                                                                                                                                                                                                                      |
|-------------|--------------------|------------------------------------------------------------------------------------------------------------------------------------------------------------------------------------------------------------------------------------------------------------------------------------------------------------------------------------------------------------------------------------------------------------------|-----------------------------------------------------------------------------------------------------------------------------------------------------------------------------------------------------------------------------------|
|             |                    |                                                                                                                                                                                                                                                                                                                                                                                                                  | Lack/no training provided to personnel<br>Ineffective training                                                                                                                                                                    |
|             | Policy             | Not in written form<br>Difficult to obtained and not being communicated to personnel<br>Not being reviewed<br>Complicated format/length/language                                                                                                                                                                                                                                                                 |                                                                                                                                                                                                                                   |
|             | Safety management  | Safety procedure                                                                                                                                                                                                                                                                                                                                                                                                 | Not in written form<br>Difficult to obtained and not being communicated to personnel<br>Complicated format/length/language                                                                                                        |
|             |                    | Planning                                                                                                                                                                                                                                                                                                                                                                                                         | Demanding working schedules<br>Working overtime<br>Need to work at night<br>Insufficient time to complete tasks<br>No/insufficient safety meetings<br>No/insufficient job analysis<br>No periodic health inspection for personnel |
|             |                    | Record and information management                                                                                                                                                                                                                                                                                                                                                                                | Occupational accidents and illnesses are not recorded<br>Occupational accidents and illnesses are not reported to governing bodies<br>Near misses are not recorded and reported                                                   |
|             |                    | Safety supervision                                                                                                                                                                                                                                                                                                                                                                                               | No/insufficient safety supervision by main contractor<br>No/insufficient safety supervision by sub-contractors<br>Poor supervision by safety personnel<br>No/insufficient inspection by governing bodies                          |
|             | Management culture | Prioritizing quality over safety<br>Occupational safety and health is not included as successful project criteria<br>Poor affiliation between management and employees<br>Poor communication between management and employees<br>Management is not sensitive with the religious and culture needs<br>Employees are not well represented<br>Insufficient commitment from management in terms of safety and health |                                                                                                                                                                                                                                   |

| First Order                             | Second Order             | Third Order                                                                                                                                                                          | Fourth Order                                                                                                                                                                                                                                                                                 |
|-----------------------------------------|--------------------------|--------------------------------------------------------------------------------------------------------------------------------------------------------------------------------------|----------------------------------------------------------------------------------------------------------------------------------------------------------------------------------------------------------------------------------------------------------------------------------------------|
| External Element<br>(underlying causes) | Politics and legislation | Insufficient legislation<br><br>Ineffective governing bodies                                                                                                                         | Mandatory training and skills established are inadequate<br>Insufficient legislation regarding licensing and competency<br>Legislation are imprecise<br>Disputed legislation<br>Ineffective implementation of legislation by governing bodies in terms of time, human resources and monetary |
|                                         | Economy                  | Difficulty in supply in services, materials and personnel in terms of time<br>Difficulty in supply in services, materials and personnel in terms of quality<br>Bad economy situation |                                                                                                                                                                                                                                                                                              |
|                                         | Social                   | Clients neglected occupational safety and health issues<br>Society neglected occupational safety and health issues<br>Lack of exposure and information provided to society           |                                                                                                                                                                                                                                                                                              |
