# Supplementary material
Source: MDPI journal article supplement (https://www.mdpi.com/2071-1050/14/24/16755)
Supplement: s1 [file s1 › Suplementary File 2.pdf]

## 1. Human Factors

**Table S1** Construction personnel's perception of worker's physical and physiological

| <b>Item</b>                                   | <b>Mean value</b> | <b>Mean value scale</b> | <b>Standard deviation</b> |
|-----------------------------------------------|-------------------|-------------------------|---------------------------|
| Unsuitable height                             | 2.48              | Slightly agree          | 1.051                     |
| Unsuitable body size                          | 2.67              | Slightly agree          | 0.999                     |
| Lack of strength                              | 3.15              | Slightly agree          | 0.984                     |
| Lack of stamina                               | 3.31              | Slightly agree          | 0.939                     |
| Suffering from extreme fatigue                | 3.89              | Agree                   | 0.739                     |
| Poor health condition                         | 3.87              | Agree                   | 0.866                     |
| Workers are physically disabled               | 3.28              | Slightly agree          | 1.121                     |
| Workers are intoxicated or under drug effects | 3.94              | Agree                   | 1.069                     |
| Workers are under stress or tension           | 4.03              | Agree                   | 0.787                     |

**Table S2** Construction personnel's perception of worker's experience

| <b>Item</b>                                                    | <b>Mean value</b> | <b>Mean value scale</b> | <b>Standard deviation</b> |
|----------------------------------------------------------------|-------------------|-------------------------|---------------------------|
| Lack of knowledge and information                              | 4.09              | Agree                   | 0.720                     |
| Too much knowledge and information (leading towards confusion) | 2.99              | Slightly agree          | 1.000                     |
| Lack of skills in conducting tasks                             | 3.97              | Agree                   | 0.767                     |
| Lack of experience and training in conducting tasks            | 4.12              | Agree                   | 0.711                     |
| Unqualified to do tasks                                        | 3.94              | Agree                   | 0.851                     |
| Workers experienced occupational accidents and illnesses       | 3.17              | Slightly agree          | 0.882                     |
| Workers experienced near-miss                                  | 3.15              | Slightly agree          | 0.840                     |
| Workers never experienced occupational accidents and illnesses | 3.02              | Slightly agree          | 0.927                     |
| Highly experienced workers causing neglecting of OSH aspect    | 3.25              | Slightly agree          | 1.130                     |
| Difficulties in language and communication                     | 3.83              | Agree                   | 0.899                     |
| Problems with reading and counting                             | 3.43              | Agree                   | 1.026                     |

Table S3 Construction personnel's perception of worker's attitude

| Item                                                             | Mean value | Mean value scale | Standard deviation |
|------------------------------------------------------------------|------------|------------------|--------------------|
| Workers do not prioritize company performance and reputation     | 3.38       | Slightly agree   | 0.934              |
| Workers do not prioritize OSH policy                             | 3.71       | Agree            | 0.952              |
| Workers do not prioritize safe working procedures                | 4.26       | Strongly agree   | 0.699              |
| Workers satisfy with their individual performance                | 3.58       | Agree            | 0.879              |
| Workers are highly overconfident                                 | 3.71       | Agree            | 0.902              |
| Workers underestimate occupational accidents and illnesses risks | 4.12       | Agree            | 0.868              |
| Workers are stubborn, arrogant, selfish, or showing off          | 4.01       | Agree            | 0.867              |
| Workers with a defeatist attitude                                | 3.18       | Slightly agree   | 0.830              |
| Workers are hesitant or having difficulty in making decisions    | 3.42       | Agree            | 0.734              |
| Workers prioritizing in fulfilling basic needs                   | 3.41       | Agree            | 0.869              |
| Workers prioritizing in fulfilling psychological needs           | 3.25       | Slightly agree   | 0.856              |
| Workers prioritizing in fulfilling self needs                    | 3.21       | Slightly agree   | 0.860              |

Table S4 Construction personnel's perception of worker's behavior

| Item                                                                     | Mean value | Mean value scale | Standard deviation |
|--------------------------------------------------------------------------|------------|------------------|--------------------|
| Error due to lack of focus/distracted                                    | 3.98       | Agree            | 0.762              |
| Error due to complicated procedures                                      | 3.47       | Agree            | 0.882              |
| Lengthy period for the tasks                                             | 3.51       | Agree            | 0.909              |
| Error due to wrong reasons/objectives                                    | 3.63       | Agree            | 0.808              |
| Workers following wrong procedures                                       | 3.95       | Agree            | 0.756              |
| Unsafe working practices pursuant to the routine of a group/organization | 3.89       | Agree            | 0.718              |
| Workers violate the rules due to limited time                            | 3.75       | Agree            | 0.800              |
| Workers violate the rules due to pressure                                | 3.79       | Agree            | 0.764              |
| Workers violate the rules due to unexpected problems                     | 3.82       | Agree            | 0.742              |

## 2. Worksite factors

Table S5 Construction personnel's perception of worksite condition

| Item                                                                             | Mean value | Mean value scale | Standard deviation |
|----------------------------------------------------------------------------------|------------|------------------|--------------------|
| Noise contributing to hearing illnesses                                          | 3.98       | Agree            | 0.747              |
| Noise contributing to communication issues                                       | 4.12       | Agree            | 0.655              |
| Insufficient lighting                                                            | 3.92       | Agree            | 0.817              |
| Ventilation issues leading to difficulty in breathing and sighting in open areas | 3.52       | Agree            | 0.925              |
| Difficulty in breathing and sighting in closed areas                             | 3.89       | Agree            | 0.760              |
| Extreme heat from hot weather                                                    | 3.89       | Agree            | 0.685              |
| Raining                                                                          | 3.88       | Agree            | 0.700              |
| Unsafe facilities (electrical, hydraulic, etc.)                                  | 4.12       | Agree            | 0.705              |

Table S6 Construction personnel's perception of worksite arrangement

| Item                                                                 | Mean value | Mean value scale | Standard deviation |
|----------------------------------------------------------------------|------------|------------------|--------------------|
| Poor level of cleanliness and tidiness                               | 4.18       | Agree            | 0.724              |
| No designated area for waste dumping/management                      | 4.02       | Agree            | 0.757              |
| No proper disposing schedule for waste                               | 4.03       | Agree            | 0.725              |
| Working path blocked                                                 | 4.17       | Agree            | 0.684              |
| Impounding surface and working path                                  | 3.94       | Agree            | 0.785              |
| Slippery surface and working path                                    | 4.05       | Agree            | 0.703              |
| Poor equipment, material, and waste arrangements                     | 4.07       | Agree            | 0.739              |
| Arrangement of equipment, material, and waste blocking working areas | 4.18       | Agree            | 0.631              |

Table S7 Construction personnel's perception of equipment and material

| Item                                                                | Mean value | Mean value scale | Standard deviation |
|---------------------------------------------------------------------|------------|------------------|--------------------|
| Construction materials unsuitable with construction tasks           | 3.40       | Slightly agree   | 1.024              |
| Construction materials in poor condition                            | 3.49       | Agree            | 0.958              |
| Construction materials give a negative impact on a health condition | 3.53       | Agree            | 0.942              |
| Equipment and tools unsuitable with construction tasks              | 3.68       | Agree            | 0.932              |
| Equipment and tools in poor condition                               | 3.88       | Agree            | 0.784              |
| Equipment and tools lack safety features                            | 4.05       | Agree            | 0.791              |

Table S8 Construction personnel's perception of the construction task

| Item | Mean value | Mean value scale | Standard deviation |
|------|------------|------------------|--------------------|
|------|------------|------------------|--------------------|

|                                                         |      |       |       |
|---------------------------------------------------------|------|-------|-------|
| Various tasks in progress simultaneously                | 3.65 | Agree | 0.776 |
| Workers need to work at various locations               | 3.62 | Agree | 0.761 |
| Workers need to work with various people simultaneously | 3.55 | Agree | 0.836 |
| Workers need to work at height                          | 4.04 | Agree | 0.866 |

### 3. Management and organization factors

Table S9 Construction personnel's perception of resources management

| Item                                                                   | Mean value | Mean value scale | Standard deviation |
|------------------------------------------------------------------------|------------|------------------|--------------------|
| Prioritizing profitability over safety                                 | 4.26       | Strongly agree   | 0.812              |
| Prioritizing prices over safety level in buying equipment              | 4.10       | Agree            | 0.756              |
| Insufficient budget for occupational safety and health management      | 4.20       | Strongly agree   | 08.741             |
| Insufficient time provided                                             | 3.75       | Agree            | 0.883              |
| Neglecting safety and health elements during recruitment and selection | 4.01       | Agree            | 0.831              |
| Lack/no training provided to personnel                                 | 4.12       | Agree            | 0.784              |
| Ineffective training                                                   | 4.03       | Agree            | 0.725              |

Table S10 Construction personnel's perception of OSH policy

| Item                                                        | Mean value | Mean value scale | Standard deviation |
|-------------------------------------------------------------|------------|------------------|--------------------|
| Not in written form                                         | 3.29       | Slightly agree   | 0.976              |
| Difficult to obtain and not being communicated to personnel | 3.58       | Agree            | 1.002              |
| Not being reviewed                                          | 3.62       | Agree            | 0.935              |
| Complicated format/length/language                          | 3.62       | Agree            | 1.007              |

Table S11 Construction personnel's perception of safety management

| Item                                                                         | Mean value | Mean value scale | Standard deviation |
|------------------------------------------------------------------------------|------------|------------------|--------------------|
| Safety procedure not in written form                                         | 3.62       | Agree            | 1.030              |
| Safety procedure difficult to obtain and not being communicated to personnel | 4.02       | Agree            | 0.915              |
| Safety procedure complicated format/length/language                          | 3.85       | Agree            | 0.933              |
| Demanding working schedules                                                  | 3.81       | Agree            | 0.738              |
| Working overtime                                                             | 3.79       | Agree            | 0.744              |
| Need to work at night                                                        | 3.59       | Agree            | 0.869              |
| Insufficient time to complete tasks                                          | 3.67       | Agree            | 0.811              |
| No/insufficient safety meetings                                              | 3.72       | Agree            | 0.809              |
| No/insufficient job analysis                                                 | 3.78       | Agree            | 0.790              |
| No periodic health inspection for personnel                                  | 3.90       | Agree            | 0.776              |
| Occupational accidents and illnesses are not recorded                        | 3.82       | Agree            | 0.840              |
| Occupational accidents and illnesses are not reported to govern bodies       | 3.73       | Agree            | 0.887              |
| Near misses are not recorded and reported                                    | 3.88       | Agree            | 0.854              |

|                                                           |      |       |       |
|-----------------------------------------------------------|------|-------|-------|
| No/insufficient safety supervision by the main contractor | 4.07 | Agree | 0.759 |
| No/insufficient safety supervision by Sub-contractor      | 4.07 | Agree | 0.759 |
| No/insufficient safety supervision by Safety officer      | 3.86 | Agree | 0.878 |
| Poor supervision by safety personnel                      | 3.85 | Agree | 0.881 |
| No/insufficient inspection by governing bodies            | 3.63 | Agree | 0.933 |

**Table S12** Construction personnel's perception of management culture

| <b>Item</b>                                                                   | <b>Mean value</b> | <b>Mean value scale</b> | <b>Standard deviation</b> |
|-------------------------------------------------------------------------------|-------------------|-------------------------|---------------------------|
| Prioritizing quality over safety                                              | 3.78              | Agree                   | 0.998                     |
| Occupational safety and health is not included as successful project criteria | 3.61              | Agree                   | 1.158                     |
| Poor affiliation between management and employees                             | 3.78              | Agree                   | 0.809                     |
| Poor communication between management and employees                           | 3.85              | Agree                   | 0.779                     |
| Management is not sensitive to the religious and cultural needs               | 3.39              | Slightly agree          | 1.075                     |
| Employees are not well represented                                            | 3.51              | Agree                   | 0.900                     |
| Insufficient commitment from management in terms of safety and health         | 3.98              | Agree                   | 0.984                     |

#### 4. External factors

**Table S13** Construction personnel's perception of political and legislation

| <b>Item</b>                                                                                                   | <b>Mean value</b> | <b>Mean value scale</b> | <b>Standard deviation</b> |
|---------------------------------------------------------------------------------------------------------------|-------------------|-------------------------|---------------------------|
| Mandatory training and skills established are inadequate                                                      | 3.32              | Slightly agree          | 0.966                     |
| Insufficient legislation regarding licensing and competency                                                   | 3.15              | Slightly agree          | 1.060                     |
| Legislation is imprecise                                                                                      | 3.02              | Slightly agree          | 1.194                     |
| Disputed legislation                                                                                          | 3.11              | Slightly agree          | 1.087                     |
| Ineffective implementation of legislation by governing bodies in terms of time, human resources, and monetary | 3.12              | Slightly agree          | 1.166                     |

**Table S14** Construction personnel's perception of the economy

| <b>Item</b>                                                                    | <b>Mean value</b> | <b>Mean value scale</b> | <b>Standard deviation</b> |
|--------------------------------------------------------------------------------|-------------------|-------------------------|---------------------------|
| Difficulty in supply in services, materials, and personnel in terms of time    | 3.25              | Slightly agree          | 0.827                     |
| Difficulty in supply in services, materials, and personnel in terms of quality | 3.35              | Slightly agree          | 0.823                     |
| Bad economy situation                                                          | 3.32              | Slightly agree          | 0.882                     |

Table S15 Construction personnel's perception of social

| <b>Item</b>                                             | <b>Mean value</b> | <b>Mean value scale</b> | <b>Standard deviation</b> |
|---------------------------------------------------------|-------------------|-------------------------|---------------------------|
| Clients neglected occupational safety and health issues | 3.98              | Agree                   | 0.816                     |
| Society neglected occupational safety and health issues | 3.69              | Agree                   | 0.939                     |
| Lack of exposure and information provided to society    | 3.75              | Agree                   | 0.934                     |
